# Supplementary material for: Too Long, Didn’t Read? The Impact of Length Limits on Microblogging Engagement
Source: Atypon-hosted journal article supplement (doi:10.1287/mnsc.2021.03629), 2025-03-18
Supplement: mnsc.2021.03629.sm1.pdf [file mnsc.2021.03629.sm1.pdf]

## Online Appendix

### Too Long, Didn't Read? The Impact of Length Limits on Microblogging Engagement

Shuting (Ada) Wang  
 Zicklin School of Business, Baruch College, City University of New York  
 shuting.wang@baruch.cuny.edu

Brad N Greenwood  
 School of Business, George Mason University  
 bgreenwo@gmu.edu

**Table A1. Comparison between Sample Users and General Weibo Users**

|                                               | Users in the sample | Users on the focal platform |
|-----------------------------------------------|---------------------|-----------------------------|
| Percentage of users born in 1990s and later   | 0.81                | 0.77 <sup>1</sup>           |
| Percentage of users born in 1980s             | 0.10                | 0.16 <sup>30</sup>          |
| Percentage of users born in 1970s and earlier | 0.09                | 0.06 <sup>30</sup>          |
| Percentage of posts from PC                   | 0.06                | 0.06 <sup>30</sup>          |
| Percentage of posts from iPhone               | 0.39                | 0.37 <sup>2</sup>           |

Note: Demographics of Weibo users are collected from *Weibo 2020 User Development Report*<sup>3</sup>.

**Table A2. Replication with A Shorter Time Window**

| VARIABLES                                               | (1)              | (2)               |
|---------------------------------------------------------|------------------|-------------------|
|                                                         | Diff-in-Diff+PSM | Diff-in-Diff +PSM |
|                                                         | Wave 1           | Wave 1            |
|                                                         | Ln(DailyPosts+1) | Ln(Likes+1)       |
| <i>Wave1Month(t-4)</i>                                  | -0.00238         | -0.0521           |
| × <i>Treatment(Wave1)</i>                               | (0.0216)         | (0.0550)          |
| <i>Wave1Month(t-3)</i>                                  | -0.00131         | -0.0411           |
| × <i>Treatment(Wave1)</i>                               | (0.0188)         | (0.0586)          |
| <i>Wave1Month(t-2)</i>                                  | -0.0278          | -0.00385          |
| × <i>Treatment(Wave1)</i>                               | (0.0200)         | (0.0378)          |
| <b>Wave1Month(t-1)×Treatment(Wave1) as the Baseline</b> |                  |                   |
| <i>Wave1Month(t)</i>                                    | 0.0446           | -0.0503           |
| × <i>Treatment(Wave1)</i>                               | (0.0296)         | (0.0701)          |
| <i>Wave1Month(t+1)</i>                                  | 0.0536**         | 0.125**           |
| × <i>Treatment(Wave1)</i>                               | (0.0236)         | (0.0600)          |
| <i>Wave1Month(t+2)</i>                                  | 0.0315*          | 0.111**           |
| × <i>Treatment(Wave1)</i>                               | (0.0180)         | (0.0525)          |
| Observations                                            | 46,008           | 10,277            |
| Individual fixed effect                                 | Yes              | Yes               |

<sup>1</sup> <https://finance.sina.com.cn/tech/2021-03-12/doc-ikkntiak9143019.shtml>

<sup>2</sup> <https://www.ifanr.com/1042323>

<sup>3</sup> <https://finance.sina.com.cn/tech/2021-03-12/doc-ikkntiak9143019.shtml>

|                   |     |     |
|-------------------|-----|-----|
| Day fixed effect  | Yes | Yes |
| Hour fixed effect | No  | Yes |

Robust standard errors clustered at the user and day level in parentheses \*\*\* p<0.01, \*\* p<0.05, \* p<0.1

**Table A3. Experiment Results (Without Monetary Incentives)**

|                                                                                   | Posts with 140-character limit | Posts with 2000-character limit | P value for t tests |
|-----------------------------------------------------------------------------------|--------------------------------|---------------------------------|---------------------|
| Length (in characters) per post                                                   | 43                             | 59                              | 0.04                |
| Time spent on writing each character (in seconds)                                 | 1.81                           | 1.31                            | 0.02                |
| Propensity to post                                                                | 0.27                           | 0.45                            | 0.02                |
| Writing quality per content unit (as measured by moving-average type-token ratio) | 0.81                           | 0.80                            | 0.88                |
| Number of likes per post                                                          | 0.00                           | 0.31                            | 0.07                |

Note: Sample size 142, among which 19 controlled participants and 32 treated participants completed the task.

**Table A4. Top 10 Most Popular Topics in Posts from Topic Analysis**

|                                | Paid Members                                                                                                                                                                                                                                                                                                                                                                  | Non-paid Members                                                                                                                                                                                                                                                                                                                                                              |
|--------------------------------|-------------------------------------------------------------------------------------------------------------------------------------------------------------------------------------------------------------------------------------------------------------------------------------------------------------------------------------------------------------------------------|-------------------------------------------------------------------------------------------------------------------------------------------------------------------------------------------------------------------------------------------------------------------------------------------------------------------------------------------------------------------------------|
| Before Wave 1                  | <ol style="list-style-type: none"> <li>1) Arts &amp; Entertainment</li> <li>2) Books &amp; Literature</li> <li>3) Online Communities</li> <li>4) Jobs &amp; Education</li> <li>5) People &amp; Society</li> <li>6) Hobbies &amp; Leisure</li> <li>7) Food &amp; Drink</li> <li>8) Travel &amp; Transportation</li> <li>9) Health</li> <li>10) Beauty &amp; Fitness</li> </ol> | <ol style="list-style-type: none"> <li>1) Arts &amp; Entertainment</li> <li>2) Books &amp; Literature</li> <li>3) Online Communities</li> <li>4) People &amp; Society</li> <li>5) Jobs &amp; Education</li> <li>6) Food &amp; Drink</li> <li>7) Hobbies &amp; Leisure</li> <li>8) Travel &amp; Transportation</li> <li>9) News</li> <li>10) Health</li> </ol>                 |
| After Wave 1 and Before Wave 2 | <ol style="list-style-type: none"> <li>1) Arts &amp; Entertainment</li> <li>2) Books &amp; Literature</li> <li>3) Online Communities</li> <li>4) Jobs &amp; Education</li> <li>5) People &amp; Society</li> <li>6) Food &amp; Drink</li> <li>7) Travel &amp; Transportation</li> <li>8) Hobbies &amp; Leisure</li> <li>9) Beauty &amp; Fitness</li> <li>10) Health</li> </ol> | <ol style="list-style-type: none"> <li>1) Arts &amp; Entertainment</li> <li>2) Books &amp; Literature</li> <li>3) Online Communities</li> <li>4) Jobs &amp; Education</li> <li>5) People &amp; Society</li> <li>6) Food &amp; Drink</li> <li>7) Travel &amp; Transportation</li> <li>8) Hobbies &amp; Leisure</li> <li>9) Beauty &amp; Fitness</li> <li>10) Health</li> </ol> |
| After Wave 2                   | <ol style="list-style-type: none"> <li>1) Arts &amp; Entertainment</li> <li>2) Jobs &amp; Education</li> <li>3) Books &amp; Literature</li> <li>4) Online Communities</li> <li>5) Food &amp; Drink</li> <li>6) People &amp; Society</li> <li>7) Hobbies &amp; Leisure</li> <li>8) Beauty &amp; Fitness</li> <li>9) Travel &amp; Transportation</li> <li>10) Health</li> </ol> | <ol style="list-style-type: none"> <li>1) Arts &amp; Entertainment</li> <li>2) Books &amp; Literature</li> <li>3) Jobs &amp; Education</li> <li>4) Online Communities</li> <li>5) People &amp; Society</li> <li>6) Food &amp; Drink</li> <li>7) Travel &amp; Transportation</li> <li>8) Hobbies &amp; Leisure</li> <li>9) Beauty &amp; Fitness</li> <li>10) Health</li> </ol> |

**Table A5. Impact on the per-Word Writing Quality (using Weibo data)**

| VARIABLES                 | (1)                     | (2)                  | (3)                   | (4)                       | (5)                  | (6)                   |           |
|---------------------------|-------------------------|----------------------|-----------------------|---------------------------|----------------------|-----------------------|-----------|
|                           | Simple Ratio            | 20-word moving ratio | 200-word moving ratio | Simple Ratio              | 20-word moving ratio | 200-word moving ratio |           |
|                           | Wave 1                  | Wave 1               | Wave 1                | Wave 2                    | Wave 2               | Wave 2                |           |
|                           | RatioOfUniqueCharacters |                      |                       | RatioOfUniqueCharacters   |                      |                       |           |
| <i>Wave1Month(t-8)</i>    | 0.00575                 | 0.00978              | -3.75e-05             | <i>Wave2Month(t-8)</i>    | -0.00481             | 0.00404               | 0.00232   |
| $\times Treatment(Wave1)$ | (0.00996)               | (0.00654)            | (0.0109)              | $\times Treatment(Wave2)$ | (0.00805)            | (0.00590)             | (0.00944) |
| <i>Wave1Month(t-7)</i>    | 3.45e-05                | 0.0117*              | 0.00830               | <i>Wave2Month(t-7)</i>    | 0.00211              | 0.00687               | 0.00630   |
| $\times Treatment(Wave1)$ | (0.00937)               | (0.00648)            | (0.00967)             | $\times Treatment(Wave2)$ | (0.00617)            | (0.00548)             | (0.00813) |
| <i>Wave1Month(t-6)</i>    | 0.00265                 | -0.00214             | 0.00476               | <i>Wave2Month(t-6)</i>    | 0.00358              | 0.000738              | 0.00139   |
| $\times Treatment(Wave1)$ | (0.00971)               | (0.00900)            | (0.0103)              | $\times Treatment(Wave2)$ | (0.00625)            | (0.00576)             | (0.00896) |
| <i>Wave1Month(t-5)</i>    | -0.00189                | 0.00356              | -0.00323              | <i>Wave2Month(t-5)</i>    | 0.00368              | 0.000669              | 0.00190   |
| $\times Treatment(Wave1)$ | (0.00820)               | (0.00777)            | (0.0110)              | $\times Treatment(Wave2)$ | (0.00739)            | (0.00559)             | (0.00866) |
| <i>Wave1Month(t-4)</i>    | 0.00359                 | 0.00636              | 0.00609               | <i>Wave2Month(t-4)</i>    | 0.00620              | 0.00920               | 0.00646   |
| $\times Treatment(Wave1)$ | (0.00901)               | (0.00913)            | (0.00980)             | $\times Treatment(Wave2)$ | (0.00608)            | (0.00549)             | (0.00682) |
| <i>Wave1Month(t-3)</i>    | -0.00459                | -0.00120             | -0.00678              | <i>Wave2Month(t-3)</i>    | 0.00426              | 0.00734               | 0.00807   |
| $\times Treatment(Wave1)$ | (0.00733)               | (0.00724)            | (0.00816)             | $\times Treatment(Wave2)$ | (0.00651)            | (0.00563)             | (0.00827) |
| <i>Wave1Month(t-2)</i>    | -0.00481                | 0.00104              | -0.00388              | <i>Wave2Month(t-2)</i>    | 0.000712             | 0.00125               | 0.00343   |
| $\times Treatment(Wave1)$ | (0.00841)               | (0.00651)            | (0.00809)             | $\times Treatment(Wave2)$ | (0.00751)            | (0.00645)             | (0.00893) |
| <i>Wave1Month(t)</i>      | 0.00380                 | 0.0123*              | 0.00662               | <i>Wave2Month(t)</i>      | 0.00570              | 0.00243               | 0.00781   |
| $\times Treatment(Wave1)$ | (0.00633)               | (0.00696)            | (0.00836)             | $\times Treatment(Wave2)$ | (0.00782)            | (0.00705)             | (0.00921) |
| <i>Wave1Month(t+1)</i>    | 0.0124                  | 0.0115*              | 0.0153                | <i>Wave2Month(t+1)</i>    | 0.00357              | -0.00413              | 0.0104    |
| $\times Treatment(Wave1)$ | (0.00837)               | (0.00602)            | (0.00918)             | $\times Treatment(Wave2)$ | (0.00745)            | (0.00672)             | (0.00952) |
| <i>Wave1Month(t+2)</i>    | 0.00738                 | 0.00564              | 0.00278               | <i>Wave2Month(t+2)</i>    | -0.000321            | -0.0113               | -0.00366  |
| $\times Treatment(Wave1)$ | (0.00900)               | (0.00650)            | (0.00919)             | $\times Treatment(Wave2)$ | (0.00941)            | (0.00723)             | (0.0108)  |
| <i>Wave1Month(t+3)</i>    | 0.00535                 | 0.00420              | 0.00283               | <i>Wave2Month(t+3)</i>    | 0.00228              | 6.14e-05              | 0.00310   |
| $\times Treatment(Wave1)$ | (0.00766)               | (0.00687)            | (0.00931)             | $\times Treatment(Wave2)$ | (0.00843)            | (0.00905)             | (0.0106)  |
| <i>Wave1Month(t+4)</i>    | 0.00370                 | 0.00995              | 0.00753               | <i>Wave2Month(t+4)</i>    | 0.0130               | 0.0120                | 0.0180    |
| $\times Treatment(Wave1)$ | (0.00817)               | (0.00612)            | (0.00959)             | $Treatment(Wave2)$        | (0.00862)            | (0.00838)             | (0.0107)  |
| <i>Wave1Month(t+5)</i>    | 0.00184                 | 0.00988              | 0.00533               | <i>Wave2Month(t+5)</i>    | 0.00588              | 0.000163              | 0.00542   |
| $\times Treatment(Wave1)$ | (0.00881)               | (0.00724)            | (0.00966)             | $\times Treatment(Wave2)$ | (0.0117)             | (0.00793)             | (0.0128)  |
| <i>Wave1Month(t+6)</i>    | 0.000604                | 0.00158              | 0.000819              | <i>Wave2Month(t+6)</i>    | 0.00923              | 0.00533               | 0.00638   |
| $\times Treatment(Wave1)$ | (0.00820)               | (0.00681)            | (0.00779)             | $\times Treatment(Wave2)$ | (0.0108)             | (0.00850)             | (0.0126)  |
| <i>Wave1Month(t+7)</i>    | 0.000381                | 0.00225              | -0.00211              | <i>Wave2Month(t+7)</i>    | 0.0108               | 0.0115                | 0.0160    |
| $\times Treatment(Wave1)$ | (0.00930)               | (0.00656)            | (0.0100)              | $\times Treatment(Wave2)$ | (0.0114)             | (0.00887)             | (0.0145)  |
| <i>Wave1Month(t+8)</i>    | 0.00902                 | 0.00883              | 0.00546               | <i>Wave2Month(t+8)</i>    | 0.0160               | 0.00574               | 0.0163    |
| $\times Treatment(Wave1)$ | (0.00887)               | (0.00759)            | (0.00985)             | $\times Treatment(Wave2)$ | (0.0112)             | (0.00917)             | (0.0148)  |
| <i>Wave1Month(t+9)</i>    | 0.00829                 | 0.00893              | 0.00836               | <i>Wave2Month(t+9)</i>    | 0.0129               | -0.00134              | 0.0143    |
| $\times Treatment(Wave1)$ | (0.00840)               | (0.00620)            | (0.0103)              | $\times Treatment(Wave2)$ | (0.0129)             | (0.0109)              | (0.0160)  |

Robust standard errors clustered at the individual and day level in parentheses

\*\*\* p<0.01, \*\* p<0.05, \* p<0.1

Note1: All interactions and control variables are included.

Note2: For Wave 1, we only include data before Wave 2 (Nov. 2016).
